# Supplementary material for: Age-related effects on a novel dual-task Stroop paradigm
Source: PubMed Central journal article supplement (PMC7924780; doi:10.1371/journal.pone.0247923), 2021-03-02
Supplement: pone.0247923.s002.pdf [file pone.0247923.s002.pdf]

## Baseline: Uncorrected Response Times

The ANOVA on uncorrected RTs yielded several effects (Table 1). First, there was a main effect of Trial Type in which both Congruent and Neutral trials were faster than Incongruent trials but did not significantly differ from each other. Second, there was a main effect of Age and an interaction between Trial Type and Age with older adults exhibiting significantly more slowing on Incongruent trials compared to younger adults.

**Table 1. Baseline inferential statistics for response latency (uncorrected)**

| ANOVA Effect     | F Value | P Value | Partial $\eta^2$ |
|------------------|---------|---------|------------------|
| <b>Mean RTs</b>  |         |         |                  |
| Trial Type       | 161.90  | < 0.01  | 0.71             |
| Age              | 45.80   | < 0.01  | 0.41             |
| Trial Type x Age | 24.30   | < 0.01  | 0.27             |

Note: Older (N=33) and Younger (N=34).

## Dual-Task: Uncorrected Response Times

The ANOVA on uncorrected RTs yielded several effects (Table 2). First, there was a main effect of Dual-Task Type in which responses were faster on the Color-Dual condition compared to the Lexical-Dual condition. Second, there was a main effect of Trial Type and an interaction between Dual-Task Type and Trial Type such that Incongruent trials were more slowed for the Lexical-Dual condition compared to the Color-Dual condition. There was a main effect of Age, as well as an interaction between Age and Trial Type with Incongruent trials being particularly slowed for older adults compared to younger adults.

**Table 2. Dual-task inferential statistics for primary task response latency (uncorrected)**

| ANOVA Effect                      | F Value | P Value | Partial $\eta^2$ |
|-----------------------------------|---------|---------|------------------|
| <b>Mean RTs</b>                   |         |         |                  |
| Dual-Task Type                    | 45.83   | < 0.01  | 0.41             |
| Trial Type                        | 224.94  | < 0.01  | 0.78             |
| Age                               | 48.80   | < 0.01  | 0.43             |
| Dual-Task Type x Trial Type       | 48.29   | < 0.01  | 0.43             |
| Dual-Task Type x Age              | 0.34    | 0.56    | 0.01             |
| Trial Type x Age                  | 20.36   | < 0.01  | 0.24             |
| Dual-Task Type x Trial Type x Age | 0.06    | 0.94    | 0.00             |

Note: Older (N=33) and Younger (N=34).

### Additional 3-Level Analyses

The following tables contain the results of 3 x 3 x 2 ANOVAs with Task Type (Baseline vs Color-Dual vs Lexical-Dual) and Trial Type (Incongruent vs Congruent vs Neutral) as within-subjects factors and Age group as a categorical between-subjects factor. Please note that the Baseline Stroop always came before either Dual-Task Stroop, so these results should be interpreted with caution.

**Table 3. Inferential statistics for primary task response latency (uncorrected)**

| ANOVA Effect                                   | F Value | P Value | Partial $\eta^2$ |
|------------------------------------------------|---------|---------|------------------|
| <b>Mean RTs (Uncorrected)</b>                  |         |         |                  |
| Task Type (Baseline; Color-Dual; Lexical-Dual) | 59.48   | < 0.01  | 0.48             |
| Trial Type                                     | 251.65  | < 0.01  | 0.80             |
| Age                                            | 51.20   | < 0.01  | 0.44             |
| Task Type x Trial Type                         | 30.14   | < 0.01  | 0.32             |
| Task Type x Age                                | 0.54    | 0.59    | 0.01             |
| Trial Type x Age                               | 26.67   | < 0.01  | 0.29             |
| Task Type x Trial Type x Age                   | 0.05    | 0.99    | 0.00             |

Note: Older (N=33) and Younger (N=34).

**Table 4. Inferential statistics for primary task response latency (corrected)**

| ANOVA Effect                                   | F Value | P Value | Partial $\eta^2$ |
|------------------------------------------------|---------|---------|------------------|
| <b>Mean RTs (Corrected)</b>                    |         |         |                  |
| Task Type (Baseline; Color-Dual; Lexical-Dual) | 71.68   | < 0.01  | 0.52             |
| Trial Type                                     | 482.77  | < 0.01  | 0.88             |
| Age                                            | 6.84    | 0.01    | 0.10             |
| Task Type x Trial Type                         | 34.61   | < 0.01  | 0.35             |
| Task Type x Age                                | 1.40    | 0.25    | 0.02             |
| Trial Type x Age                               | 19.19   | < 0.01  | 0.23             |
| Task Type x Trial Type x Age                   | 0.82    | 0.51    | 0.01             |

Note: Older (N=33) and Younger (N=34).

**Table 5. Inferential statistics for primary task error rates**

| ANOVA Effect                                   | F Value | P Value | Partial $\eta^2$ |
|------------------------------------------------|---------|---------|------------------|
| <b>Error Rates</b>                             |         |         |                  |
| Task Type (Baseline; Color-Dual; Lexical-Dual) | 7.83    | < 0.01  | 0.12             |
| Trial Type                                     | 35.12   | < 0.01  | 0.35             |
| Age                                            | 28.60   | < 0.01  | 0.31             |
| Task Type x Trial Type                         | 9.30    | < 0.01  | 0.13             |
| Task Type x Age                                | 4.67    | 0.01    | 0.07             |
| Trial Type x Age                               | 6.05    | < 0.01  | 0.09             |
| Task Type x Trial Type x Age                   | 7.92    | < 0.01  | 0.12             |

Note: Older (N=33) and Younger (N=34).
